# Supplementary material
Source: PubMed Central journal article supplement (PMC5791065)
Supplement: ASN.2017030348SupplementaryData1.pdf [file ASN.2017030348SupplementaryData1.pdf]

## **SUPPLEMENTARY MATERIALS**

### **SUPPLEMENTARY METHODS:**

#### **Patient groups:**

All protocols were approved by the Northwestern University (NWU) and University of Louisville Institutional Review Boards. Informed written consent was obtained for all donors and recipients. For the FCRx therapy group, conditioning regimen, kidney transplantation, maintenance immunosuppression, and infusion of bioengineered FDA-regulated HSC product enriched for facilitating cells (FCRx) (IDE 13947) were reported previously (12-14).

For the standard immunosuppression group, induction therapy with alemtuzumab and short course of steroids was used for all except one patient, who underwent basiliximab induction. Tacrolimus (8-10 ng/mL) and MMF (1-1.25 g orally twice daily) were used as maintenance immunosuppression. Adjustments in immunosuppression dose were made for adverse events.

#### **Renal biopsy samples:**

This study utilized FFPE allograft kidney biopsy samples from KTx recipients diagnosed with acute cellular rejection (R; n = 10) and without acute rejection under standard immunosuppression (SIS; n = 10, 6 samples used for the microarray analyses and RT-qPCR reactions, and 4 for additional independent validation of genes using RT-qPCR) as well as from FCRx induced tolerant recipients (FCRx; n = 7) and paired pre-implantation donor allograft biopsy samples from FCRx (D; n = 5) and SIS (SIS<sub>D</sub>; n = 2).

#### **Validation of gene expression profiling from FFPE samples:**

In order to assess the performance characteristics of gene expression profiling from possibly degraded specimens, such as FFPE archival samples, we run paired fresh-frozen: FFPE in triplicates of two different tissue types from archival samples (collected and banked in 2009),

on HG-U133Plus 2.0 arrays. For the fresh-frozen samples, total RNA was isolated from 10- $\mu$ m thick frozen tissue sections using the MagMAX™-96 for Microarrays Total RNA Isolation Kit (Invitrogen™ Life Technologies, Carlsbad, CA), in an automated fashion using the magnetic particle processors MagMAX™ Express. For the paired FFPE samples, total RNA was isolated as described above.

### **Validation of array reactions using RT-qPCR reactions for top up- and down-regulated genes:**

To validate the results from the microarrays, top genes (up- and down-regulated in unique and common analysis) were validated using RT-qPCR reactions as previously described (40). Additionally, two genes differentially expressed between FCRx and SIS samples were validated (a) using same samples (FCRx, n=7 vs. SIS; n=6); and (b) using same RNA used for microarray reactions from FCRx (n=7) and an independent set of SIS samples (n=4).

## **SUPPLEMENTARY RESULTS**

### **Successful validation of FFPE samples using gene expression analysis.**

As most of the studies were carried out using formalin fixed paraffin embedded (FFPE) biopsy samples in which molecular messages can be degraded, we performed quality control analyses using paired FFPE and frozen samples. Highly reproducible results were obtained between paired fresh-frozen vs. FFPE samples (**Fig. S1**). A gene signature of 241 probe sets created from FFPE samples (**Fig. S2A**) showed a near 70% overlap with a similar gene signature created from fresh-frozen samples (**Fig. S2B**). The 241 probe set signature was able to cluster together in replicates for both FFPE ( $r=0.991$ ) and paired fresh-frozen ( $r=0.994$ ) samples as well as to distinguish different biological phenotypes (**Fig. S3**). Thus, the analyses showed that despite a lower number of genes being captured in the FFPE samples, the overall critical top pathways

and functions were comparable, and hence FFPE samples were used for subsequent studies of differentially expressed genes (DEGs).

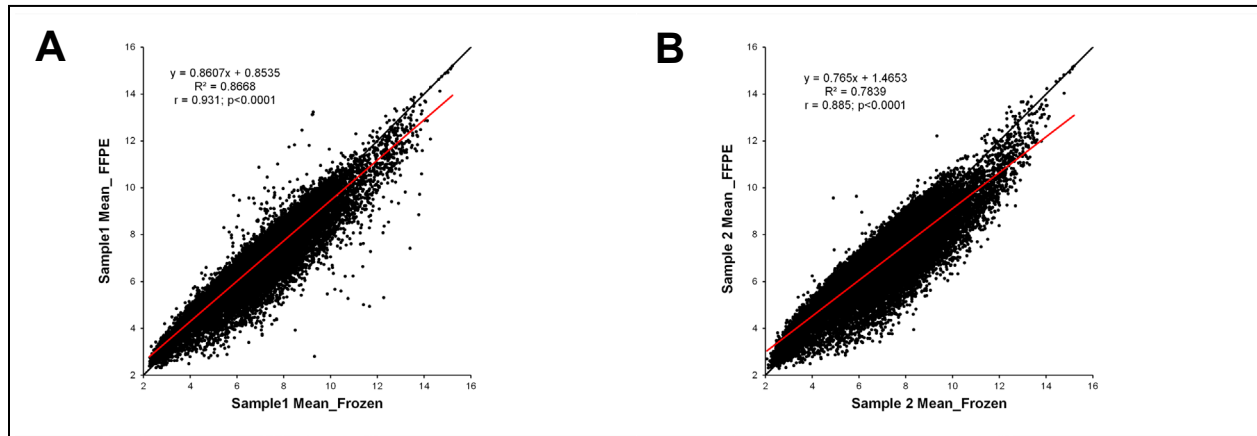

**Fig. S1. Scatterplots of RMA-normalized probe set summary means.**

(A) Pearson's correlation of the mean values for the paired FFPE: fresh-frozen samples for tissue type 1 (Sample 1), and (B) for tissue type 2 (Sample 2). The identity line is shown in red.

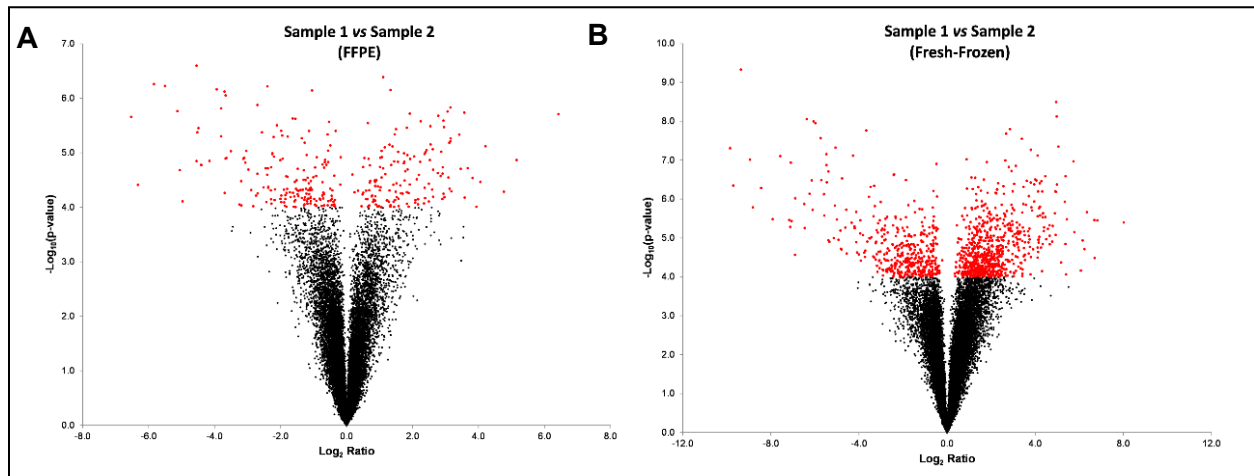

**Fig. S2. Differentially expressed genes between biological types.** Volcano plots for (A) FFPE and (B) fresh-frozen comparisons, where red points correspond to significantly altered probe sets for each comparison.

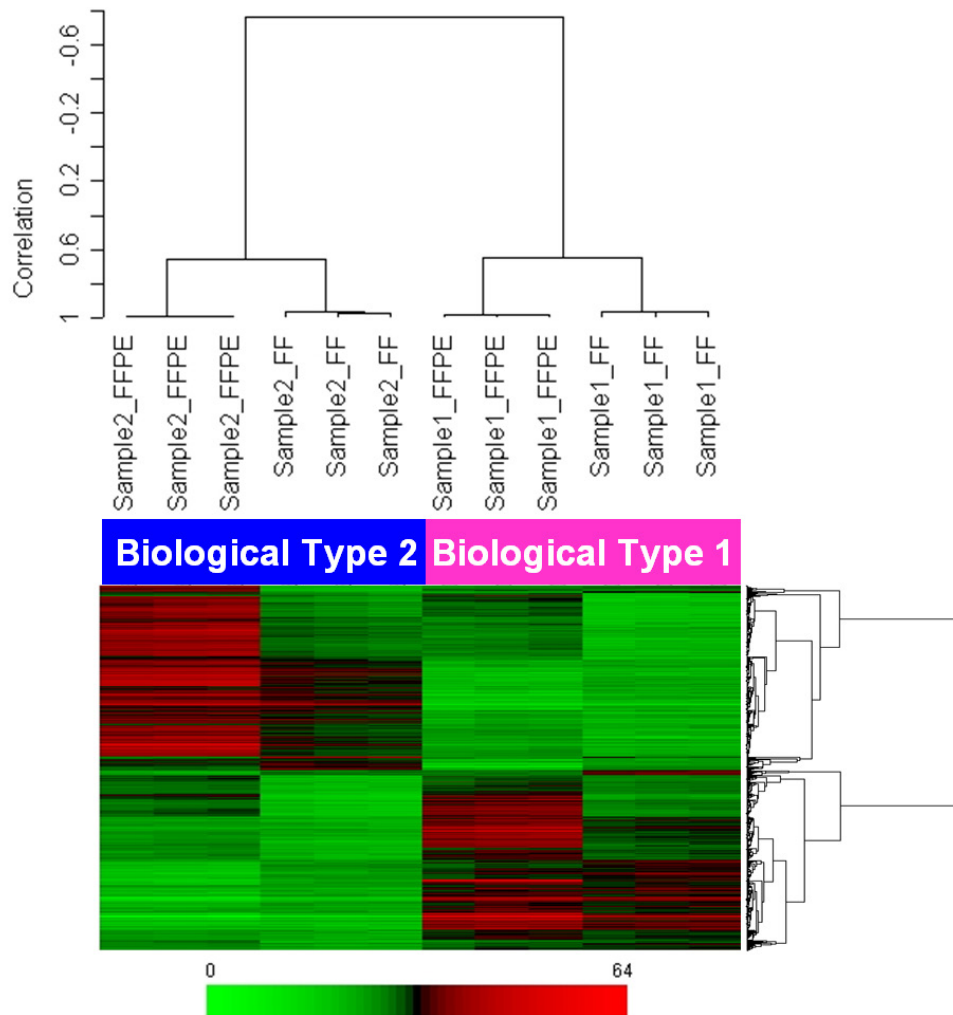

**Fig. S3. Supervised hierarchical clustering analysis.** The heat map and agglomerative dendrogram illustrate the correlation between triplicates of paired FFPE: fresh-frozen samples based on 241 differentially expressed probe sets between the two different biological types. The dendrogram correlation distance bar among tissue types (Biological Types) is shown. Green: down-regulation; Red: up-regulation; FFPE: formalin-fixed, paraffin-embedded; FF: fresh-frozen.

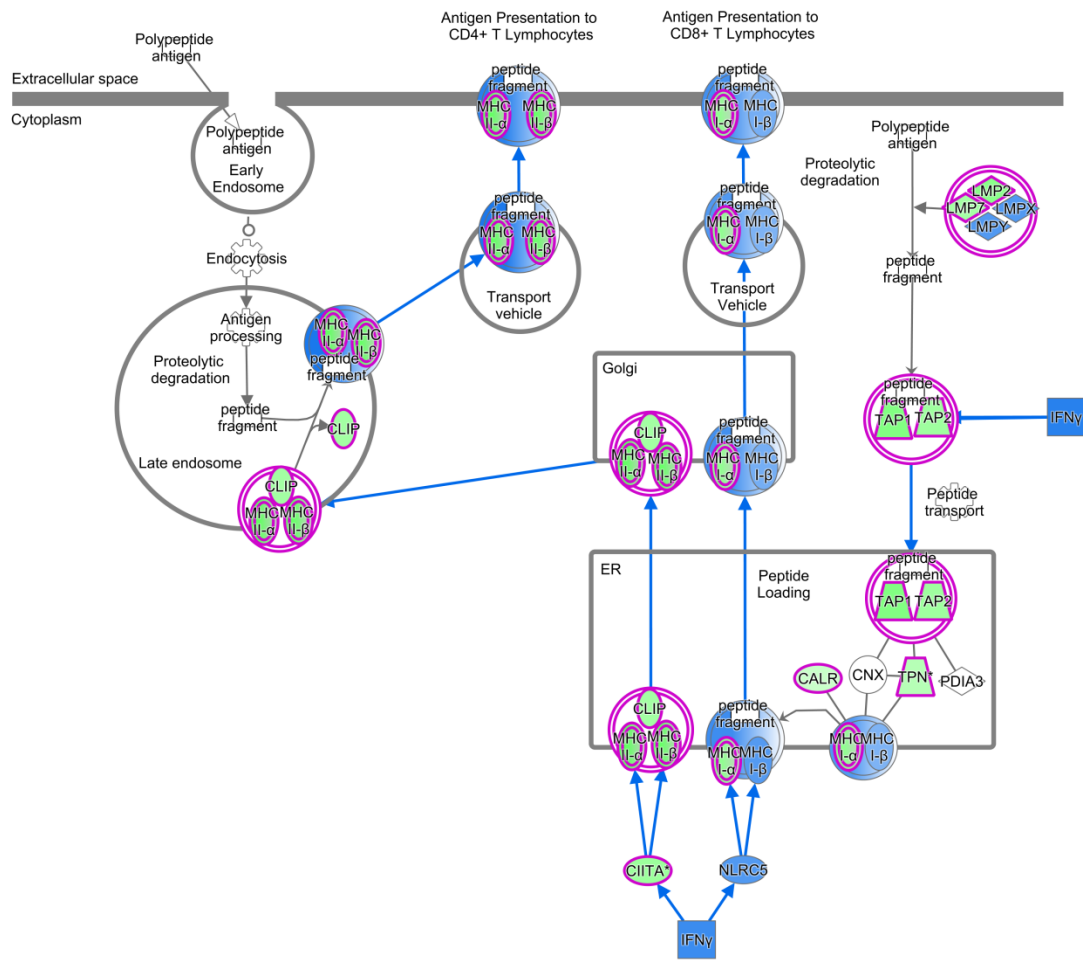

**Fig. S4A. Principal canonical pathways downregulated in FCRx vs. R samples.**

**A.** Antigen presentation pathway. Green: downregulated.

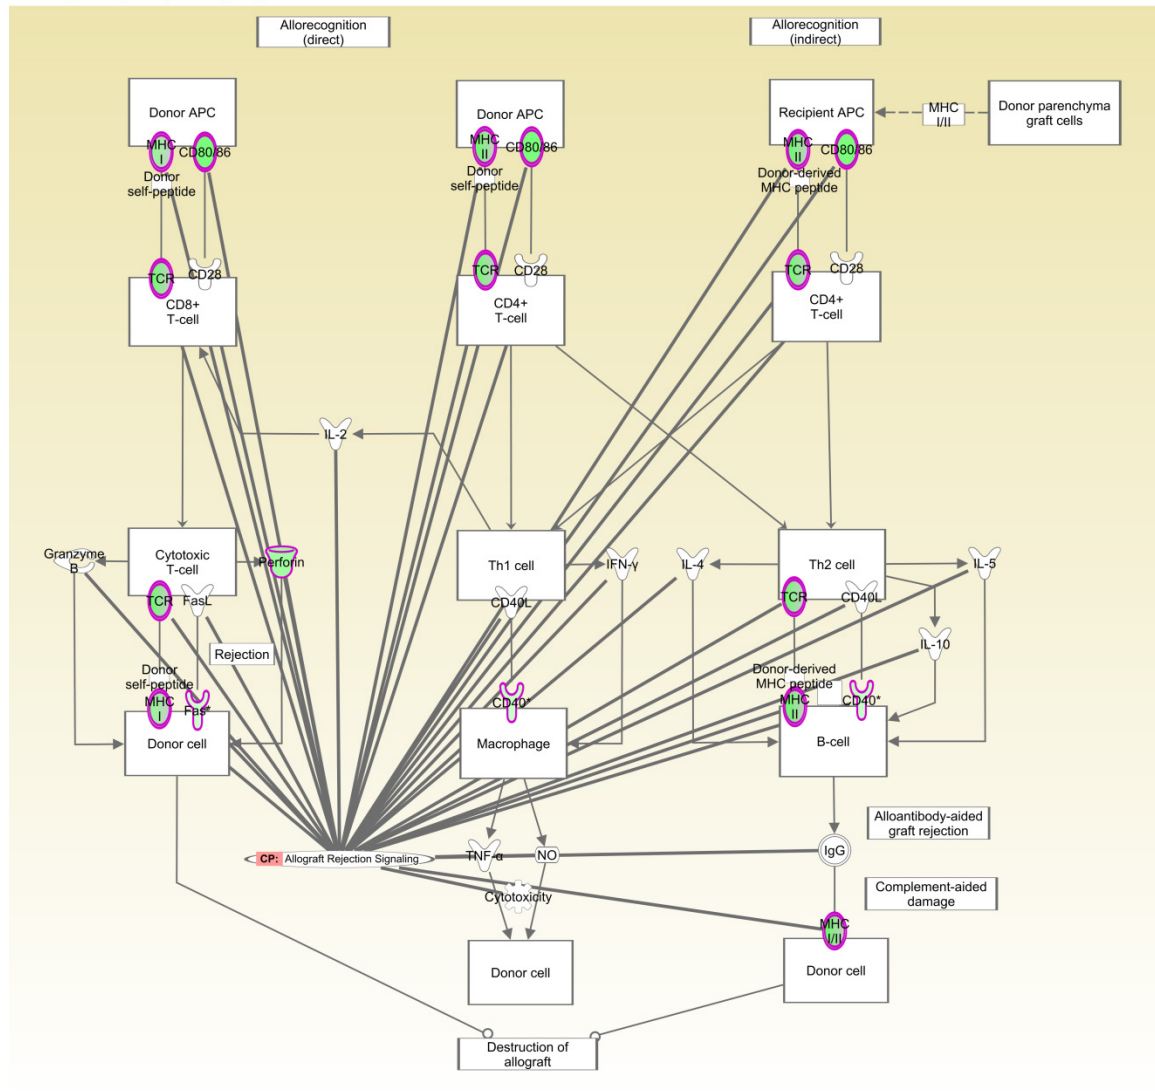

**Fig. S4B. Principal canonical pathways downregulated in FCRx vs. R samples.**

**B.** Pathway design for allograft rejection signaling in association with differentially expressed genes robustly related with absence of acute rejection in the FCRx samples.

**Table S1.** Immune response related cellular functions of FCRx upregulated genes versus SIS

| Cellular Function                            | Molecules                                                                                                                                                                                                                                                                                                                                                                                                                                                                                                                                                                                                                                                  | z-score | p-Value  |
|----------------------------------------------|------------------------------------------------------------------------------------------------------------------------------------------------------------------------------------------------------------------------------------------------------------------------------------------------------------------------------------------------------------------------------------------------------------------------------------------------------------------------------------------------------------------------------------------------------------------------------------------------------------------------------------------------------------|---------|----------|
| recruitment of granulocytes                  | ACKR1,APOA1,CAT,CD14,CXCL8,CXCL9,CYP1A2,DPP4,FASTK,GRK6,HSPA1A/HSPA1B,IKBKB,IL1RL1,IRF3,KDM6B,KITLG,MDK,PIK3CD,PRKCQ,PTN,RASGRP2,SELPLG,SMAD3,STOD2,ST3GAL4,THBS1,TRAF3IP2,VAV2                                                                                                                                                                                                                                                                                                                                                                                                                                                                            | 3.32    | 4.97E-02 |
| proliferation of blood cells                 | ACLY,ADA,AHNAK,APOA1,ARIH2,BABAM1,BAX,BBC3,BCL2,BCL6,BCLAF1,BHLHE40,BMI1,BMP4,CASP8,CAT,CD14,CD24,CD27,CD58,CD79A,CD83,CDKN1B,CEBPB,CSF2RA,CTSZ,CXCL8,DGCR8,DGKA,DIAPH1,DLG1,DPP4,DRD2,EPO,EPORE,ERCC1,ETS1,ETV6,FGFR1,FUBP1,GADD45A,GADD45B,GP2,GRM5,GSTP1,HES1,HMGA1,HOXB3,HSF1,HSPA1A/HSPA1B,ID2,IFNGR1,IKBKB,IKZF2,IL1RL1,IL23A,IMPDH1,ITGB1,JUNB,JUND,KITLG,KLF9,LAT2,LPIN1,MAF,MAPK11,MAPK3,MARCH7,MDK,MED1,MICA,MSN,MYH10,NDFIP1,NFATC3,NFKBIA,NOTCH3,PBX1,PIK3CD,PKN1,PLAU,PRKAR1A,PRKCQ,PRNP,PTN,PTPN11,RARA,RHBDF2,RNF128,SLAMF1,SMAD3,SPHK2,SPN,ST3GAL2,STAT1,STAT5B,TCF12,TCF3,TG,THBS1,TNFRSF12A,TNFRSF21,TOB1,TRAF2,TRIM33,VAV2,VEGFA,ZBTB32 | 2.614   | 2.54E-02 |
| cell viability of leukocyte cell lines       | BCL2,CADM1,CD27,CSF2RA,EPO,ETV6,FGFR1,GRK6,KITLG,MCL1,MYBL2,PTPN1,YWHAZ                                                                                                                                                                                                                                                                                                                                                                                                                                                                                                                                                                                    | 2.6     | 1.26E-02 |
| growth of lymphoid organ                     | APP,BBC3,BMP4,CD79A,CDKN1B,IFNGR1,IKBKB,IMPDH1,KITLG,LFNG,MAP3K3,MAPK3,NFKBIA,PIK3CD,PRKCQ,PTGES2,RNF128,SMAD3,STAT5B,TCF12,TCF3                                                                                                                                                                                                                                                                                                                                                                                                                                                                                                                           | 2.449   | 1.51E-02 |
| production of hematopoietic progenitor cells | ADA,EPO,EPOR,ETS1,ID2,KITLG,NFKBIA,THRA                                                                                                                                                                                                                                                                                                                                                                                                                                                                                                                                                                                                                    | 2.433   | 3.38E-03 |
| quantity of T lymphocytes                    | ADA,APOA1,APP,ARID5A,ATP6AP2,BAD,BAX,BBC3,BCL2,BCLAF1,BHLHE40,CASP8,CD27,CD79A,CD83,CDKN1B,DDX58,DGKA,DIAPH1,DNMT1,DNMT3A,E2F4,EEF1D,ETS1,ETV6,FGFR1,GADD45A,GADD45B,GALNT1,GRK6,HDAC3,HELLS,HIVEP2,ID1,ID2,IFNGR1,IKBKB,IL1RL1,IL23A,IRAK1,KITLG,MAF,MAPK3,MCL1,MDK,MR1,MYBL2,NBN,NDFIP1,NFATC3,NFKBIA,NOTCH3,PBX1,PIK3CD,PRKCQ,PRNP,SELPLG,ST14,ST3GAL2,STAT1,STAT5B,TCF12,TCF3,TCF4,TG,THBS1,THRA,TNFRSF21,TOB1,TRAF2,TRAF3IP2,TRIB2,UPF1,VAV2,VEGFA,ZBTB17                                                                                                                                                                                             | 2.224   | 2.67E-03 |
| development of burst-forming erythroid cells | EPO,EPOR,IFNGR1,KITLG,STAT1,VEGFA                                                                                                                                                                                                                                                                                                                                                                                                                                                                                                                                                                                                                          | 2.219   | 3.75E-05 |
| survival of pro-B lymphocytes                | BCL2,HLF,PML,STAT5B,TCF3                                                                                                                                                                                                                                                                                                                                                                                                                                                                                                                                                                                                                                   | 2.191   | 8.33E-03 |

|                                          |                                                                                                                                                                                                                                                                                                                                                                                                                                                                                                                                                                                              |       |          |
|------------------------------------------|----------------------------------------------------------------------------------------------------------------------------------------------------------------------------------------------------------------------------------------------------------------------------------------------------------------------------------------------------------------------------------------------------------------------------------------------------------------------------------------------------------------------------------------------------------------------------------------------|-------|----------|
| cell movement                            | ACKR1,ADA,ADAM15,ADD2,APBA3,APOA1,APP,AQP3,BAX,BCL2,BMP4,CAT,CD14,CD200,CD207,CD58,CKLF,CREB3,C SF2RA,CTSZ,CX3CL1,CXCL8,CXCL9,CYP1A2,DAXX,DCTN2 ,DIAPH1,DPP4,DRD2,EGFL7,ENTPD1,EPO,EPS8,ETS1,ETV 6,FASTK,FCER1A,FGFR1,FLNA,G6PC,GALNT1,GNA11,GNA S,GPSM3,GRK6,HP,HSPA1A/HSPA1B,IFNGR1,IKBKB,IL1RL 1,IL23A,IRF3,ITGB1,KDM6B,KITLG,KNG1,LUM,MAPK3,MDK, MMP14,NARS,NDST1,NFE2L2,NFKBIA,NOTCH3,PA2G4,PIK 3CD,PLAU,PLXND1,PRKCQ,PRNP,PTN,PTPN1,PTPN11,PVR ,RALGDS,RAMP1,RAP1A,RAP1GAP,RASGRP2,RGS3,SELPL G,SLAMF1,SLAMF8,SMAD3,SOD2,SPHK2,SPN,ST3GAL4,ST AT2,THBS1,TRAF3IP2,VAMP7,VASP,VAV2,VEGFA | 2.055 | 4.1E-02  |
| proliferation of activated T lymphocytes | BAX,BCL2,CD24,CDKN1B,EPO,HSPA1A/HSPA1B,IL23A,PRK CQ,SLAMF1,SMAD3,STAT5B                                                                                                                                                                                                                                                                                                                                                                                                                                                                                                                      | 2.035 | 2.02E-02 |



| <b>Table S2A.</b> Upstream regulators with significant predicted activation in FCRx vs. SIS |                                   |                           |                           |
|---------------------------------------------------------------------------------------------|-----------------------------------|---------------------------|---------------------------|
| <b>Upstream Regulator (*)</b>                                                               | <b>Molecule Type</b>              | <b>Activation z-score</b> | <b>p-value of overlap</b> |
| EIF4E                                                                                       | translation regulator             | 2.6                       | 0.013                     |
| CD5                                                                                         | transmembrane receptor            | 2                         | 0.238                     |
| MYCN                                                                                        | transcription regulator           | 3.1                       | 0.00273                   |
| IRF3                                                                                        | transcription regulator           | 2.9                       | 0.00289                   |
| IRF7                                                                                        | transcription regulator           | 2.8                       | 0.232                     |
| EBF1                                                                                        | transcription regulator           | 2.8                       | 0.00054                   |
| IRF5                                                                                        | transcription regulator           | 2.6                       | 0.0867                    |
| ETS1                                                                                        | transcription regulator           | 2.4                       | 0.00452                   |
| POU2F2                                                                                      | transcription regulator           | 2.3                       | 0.0114                    |
| NEUROG1                                                                                     | transcription regulator           | 2.2                       | 0.388                     |
| KLF11                                                                                       | transcription regulator           | 2.2                       | 0.0189                    |
| IRF8                                                                                        | transcription regulator           | 2                         | 0.0379                    |
| IRF1                                                                                        | transcription regulator           | 2                         | 0.432                     |
| GMNN                                                                                        | transcription regulator           | 2                         | 1                         |
| SOX1                                                                                        | transcription regulator           | 2                         | 0.488                     |
| SOX3                                                                                        | transcription regulator           | 2                         | 1                         |
| STAT5B                                                                                      | transcription regulator           | 2                         | 0.0158                    |
| TP73                                                                                        | transcription regulator           | 2                         | 0.00113                   |
| NFATC2                                                                                      | transcription regulator           | 2                         | 0.144                     |
| RUNX3                                                                                       | transcription regulator           | 2                         | 0.238                     |
| PTF1A                                                                                       | transcription regulator           | 2                         | 0.0868                    |
| FGF8                                                                                        | growth factor                     | 2.8                       | 0.22                      |
| IGF1                                                                                        | growth factor                     | 2.4                       | 3.7E-05                   |
| BMP2                                                                                        | growth factor                     | 2.2                       | 0.00798                   |
| TGFB1                                                                                       | growth factor                     | 2                         | 1.8E-17                   |
| IFNA2                                                                                       | cytokine                          | 3                         | 6.9E-05                   |
| IFNB1                                                                                       | cytokine                          | 2.9                       | 0.00125                   |
| IFNG                                                                                        | cytokine                          | 2.4                       | 6.9E-05                   |
| IFNL1                                                                                       | cytokine                          | 2.2                       | 5.5E-05                   |
| IFNA1/IFNA13                                                                                | cytokine                          | 2                         | 0.0188                    |
| FHIT                                                                                        | enzyme                            | 2.4                       | 0.00981                   |
| MGEA5                                                                                       | enzyme                            | 2.4                       | 2.2E-07                   |
| PIN1                                                                                        | enzyme                            | 2.2                       | 0.164                     |
| IRS1                                                                                        | enzyme                            | 2.2                       | 0.00024                   |
| EHHADH                                                                                      | enzyme                            | 2                         | 0.0121                    |
| HSD17B4                                                                                     | enzyme                            | 2                         | 0.0603                    |
| Fcor                                                                                        | enzyme                            | 2                         | 0.00358                   |
| ERBB2                                                                                       | kinase                            | 2.9                       | 3.5E-08                   |
| EPHB4                                                                                       | kinase                            | 2.1                       | 0.0135                    |
| Smad                                                                                        | complex                           | 2                         | 0.018                     |
| NR5A2                                                                                       | ligand-dependent nuclear receptor | 2.2                       | 0.049                     |
| miR-200b-3p                                                                                 | mature microrna                   | 2                         | 0.0769                    |
| FSHR                                                                                        | g-protein coupled receptor        | 2                         | 0.0135                    |
| Interferon alpha                                                                            | group                             | 3.2                       | 0.00121                   |
| IFN Beta                                                                                    | group                             | 2.4                       | 0.00072                   |

|                                                        |       |     |         |
|--------------------------------------------------------|-------|-----|---------|
| IFN type 1                                             | group | 2.3 | 0.00067 |
| Insulin                                                | group | 2.1 | 0.00645 |
| Akt                                                    | group | 2.1 | 2.8E-05 |
| Calmodulin                                             | group | 2   | 0.312   |
| Ins1                                                   | other | 3.4 | 0.00017 |
| MAVS                                                   | other | 2.4 | 0.164   |
| MUC1                                                   | other | 2.2 | 0.00018 |
| (*) All upstream regulators are predicted as activated |       |     |         |

**Table S2B.** Regulator effects associated with FCRx vs. SIS gene profile

| Regulators                                       | Consistency Score | Target Molecules in Dataset                                                                             | Diseases & Functions                                                                                                                                                          |
|--------------------------------------------------|-------------------|---------------------------------------------------------------------------------------------------------|-------------------------------------------------------------------------------------------------------------------------------------------------------------------------------|
| EPHB4                                            | 6.124             | BMP4,CSF2RA,KITLG,PAX3,STAT5B,TBX2                                                                      | cell transformation,development of genitourinary system,organismal death,proliferation of blood cells                                                                         |
| EIF4E,Ins1,INSR,Insulin,IRF8,MGEA5,PKD1,PPARGC1A | 5.774             | BCL2,CDKN1B,CEBPB,ERCC1,FGF18,ME1,NFE2L2,NFKBIA,PML,THBS1,TNFRSF12A,VEGFA                               | proliferation of hepatocytes                                                                                                                                                  |
| EIF4E                                            | 4.596             | BAD,BCL2,CDC34,CEBPB,MCL1,NFKBIA,NOL3,PA2G4                                                             | cell death of melanoma cell lines,invasion of cells,proliferation of epithelial cells                                                                                         |
| ETS1,GF11                                        | 3.328             | BMP4,CXCL8,DIAPH1,ID2,IKBKB,JUNB,MAPK3,NFKBIA,PLAU,PML,SMAD3,STAT1,TRAF2                                | Growth Failure,transactivation                                                                                                                                                |
| mir-122,miR-122-5p                               | 2.858             | MAPK11,PKM,PTPN1,RAD21,SLC7A1,TRPV6                                                                     | cell viability                                                                                                                                                                |
| IRS1                                             | 2.673             | BMP6,CEBPB,G6PC,ID2,LAMA4,MAPK12,MMP14,MYBL2,NR2F1,PAX3,PCK1,PDGFA,THRA,VEGFA                           | cell movement of endothelial cells,cell movement of tumor cell lines,cell survival,concentration of D-glucose,neonatal death,quantity of T lymphocytes,transactivation of RNA |
| IFNL1,IRF3,MUC1                                  | 2.593             | AHNAK,BAD,CD83,CXCL8,DDX58,HERC6,IFI44,IFITM1,IKBKB,JUNB,NFKBIA,PLAU,PML,PPP2R3A,SOD2,SORL1,SP100,STAT1 | cell cycle progression,neoplasia of epithelial cells,Renal Cancer and Tumors,urinary tract cancer                                                                             |
| EBF1,POU2F2                                      | 2.5               | BCL6,PIK3CD,SCD,TCF3                                                                                    | hypoplasia of organ                                                                                                                                                           |
| NR5A2                                            | 2.449             | APOA1,BCL2,CEBPB,JUNB,LHB,TDGF1                                                                         | growth of tumor,transcription of RNA                                                                                                                                          |
| mir-133                                          | 2.236             | DNMT1,FSCN1,GSTP1,HCN2,MMP14                                                                            | migration of tumor cell lines,organismal death                                                                                                                                |

|                                                 |       |                                                                                                                                                                                                                                                                                                                                                                                                                                                                                                                                                                                                                                                                                                                                                                                                                               |                                                                                                           |
|-------------------------------------------------|-------|-------------------------------------------------------------------------------------------------------------------------------------------------------------------------------------------------------------------------------------------------------------------------------------------------------------------------------------------------------------------------------------------------------------------------------------------------------------------------------------------------------------------------------------------------------------------------------------------------------------------------------------------------------------------------------------------------------------------------------------------------------------------------------------------------------------------------------|-----------------------------------------------------------------------------------------------------------|
| ESR1,IFN Beta,IFNA2,IFNB1,Interferon alpha,MUC1 | 2.186 | AHNAK,ATP2B1,BAX,BCL2,BHLHE40,CALD1,CDKN1B,CXCL8,DDX58,ENPEP,FGFR1,FLNA,G6PD,GLS,GNAS,HSP90AA1,HSPA1A/HSPA1B,IFITM1,IGFBP5,IKBKB,ITGB1,KL,MCRS1,MR1,MUC5AC,NFKBIA,NUP153,PALLD,PDE4A,PSD4,PTPRT,RAD21,RARA,RHEB,SMC3,SOD2,SULT1C2,THBS1,UBA7,VCL,VEGFA                                                                                                                                                                                                                                                                                                                                                                                                                                                                                                                                                                        | Renal Cancer and Tumors,urinary tract cancer                                                              |
| EBF1                                            | 2.041 | ACACB,BCL6,EIF4EBP1,INPPL1,PTPN1,STAT1                                                                                                                                                                                                                                                                                                                                                                                                                                                                                                                                                                                                                                                                                                                                                                                        | size of body                                                                                              |
| Ins1                                            | 2     | CDKN1B,CEBPB,E2F4,ERCC1,G6PD,JUNB,MAPK3,PRLR,VEGFA                                                                                                                                                                                                                                                                                                                                                                                                                                                                                                                                                                                                                                                                                                                                                                            | proliferation of fibroblast cell lines,proliferation of hepatocytes                                       |
| IFNA1/IFNA13                                    | 1.732 | IFITM1,STAT1,UBE2L6                                                                                                                                                                                                                                                                                                                                                                                                                                                                                                                                                                                                                                                                                                                                                                                                           | invasion of tumor cell lines                                                                              |
| IFN Beta,IFN type 1,IFNA2,Interferon alpha,MUC1 | 1.491 | APOL2,ATF5,BAX,BCL2,BCL6,BMP4,CASP8,CD83,CDKN1B,CEBPB,CHMP5,CX3CL1,CXCL8,CYP1A2,DDX58,DPP4,E2F4,ENPEP,EPB41L3,GLS,GNAS,HERC6,HSPA1A/HSPA1B,IFI44,IFITM1,IKBKB,ITGB1,KDM5A,MCL1,MCRS1,N4BP1,NFKBIA,OGFR,PLAU,PML,PTBP1,RNF31,SOD2,SP100,STAT1,STAT2,TRANK1,TRIB2,UBA7,VEGFA                                                                                                                                                                                                                                                                                                                                                                                                                                                                                                                                                    | neoplasia of epithelial cells,Renal Cancer and Tumors,tumorigenesis of genital tumor,urinary tract cancer |
| COL18A1,mir-122,TFAM                            | 1.429 | ACADM,AUH,BAD,BCL2,CYP1A2,ETS1,F11,FGFR1,HK1,ID1,KNG1,MAP3K3,MAX,MCL1,PFKP,PKM,PLAU,PTPN1,RAD21,SPOCK1,STAT1,THBS1,TNPO2,VEGFA                                                                                                                                                                                                                                                                                                                                                                                                                                                                                                                                                                                                                                                                                                | epithelial-mesenchymal transition,necrosis of malignant tumor,tumorigenesis of genital tumor              |
| ESR1,IFN Beta,IFN type 1,IFNA2,IFNB1,MUC1,PKD1  | 1.209 | ABCA4,ACTR2,ADD3,AHNAK,ANAPC5,ATP11A,ATP2A3,ATP2B1,ATP6V1A,BAX,BAZ2A,BCL2,BCL6,BCLAF1,BHLHE40,BMP4,BRAP,CA2,CALD1,CASP8,CD14,CDKN1B,CKB,CNP,CPE,CX3CL1,CXCL8,CYFIP2,CYP1A2,CYP2C9,DAB2,DDX58,DIAPH1,DLG1,DPP4,ENPEP,EPB41L3,EZH1,FBN1,FGFR1,FLNA,FMR1,FOXC1,G6PC,G6PD,GABBR2,GATM,GLS,GNAS,GPRASP1,GULP1,HERC6,HSP90AA1,HSPA2,IDH1,IFI44,IFITM1,IFNGR1,IFRD1,IGFBP5,IKBKB,IL1RL1,IRF3,JUNB,KDM4B,KDM5A,KL,KNG1,KPNA3,KTN1,LANCL1,LHB,MADD,MAN1A1,MAPK11,MAPK8IP3,MAST2,MINK1,MR1,MUC5AC,MYH10,MYO6,N4BP1,NFIX,NFKBIA,NOTCH3,NUP153,NUP210,PAH,PALLD,PCDH9,PPDCD4,PDE4A,PDZK1,PLCB1,PLCE1,PPP5C,PRKAR1A,PRLR,PSD4,PTPRT,RAD21,RAMP3,RARA,RDX,RGS3,RHEB,RRBP1,SEC23IP,SEMA4C,SH2B1,SLC25A36,SLC2A2,SLC7A1,SMC3,SOD2,STAT1,STAT2,STX6,SULT1C2,TBCD,TEAD4,TGOLN2,THBS1,THBS3,THBS4,TMF1,TNFAIP2,TNPO1,TRAF2,TRIM38,UBA7,VCL,VEGFA | genitourinary carcinoma,Renal Cancer and Tumors,tumorigenesis of genital tumor,urinary tract cancer       |

|                                |       |                                                                                                                                                       |                                      |
|--------------------------------|-------|-------------------------------------------------------------------------------------------------------------------------------------------------------|--------------------------------------|
| IFN type 1,IGF1,IL1RN,MYCN,RB1 | 1.134 | ADA,APP,BAX,BBC3,BCL2,BCL6,CAD,CNA2,CDKN1B,CEBPB,CXCL8,DNMT1, DNMT3A,ETV6,FBN1,ID1,ID2,IFI44,IFI6,IGFBP7,MAF,MCL1,NBN,NFKBIA,SP100, STAT1,STAT2,VEGFA | non-Hodgkin disease                  |
| TCF7L2                         | 0.354 | BMP4,CDKN1B,HSPA2,ID4,LAMP1,PTP N11,QKI,VEGFA                                                                                                         | development of genital organ         |
| PKD1                           | 0.218 | DDX3Y,DPEP1,EIF4EBP1,EZH1,FGFR1, GATM,GLS,GPRASP1,IDH1,KNG1,MINK 1,PAH,PCDH7,PCDH9,PCK1,PRLR,RGS 3,SEMA4C,SLC16A4,SLC2A2,TRAF2                        | tumorigenesis of epithelial neoplasm |

| Table S3. Cell type enrichment for differentially expressed genes between FCRx and SIS |                                     |
|----------------------------------------------------------------------------------------|-------------------------------------|
| Cell Type                                                                              | Enrichment adjusted- <i>P</i> value |
| Kidney                                                                                 | 0.000176064                         |
| CD33+ Myeloid                                                                          | 0.005398789                         |
| CD8+ T Cells                                                                           | 0.007401828                         |
| BDCA4+ Dendritic Cells                                                                 | 0.007764024                         |
| CD4+ T Cells                                                                           | 0.009844623                         |
| CD19+ B cells                                                                          | 0.036294635                         |

| <b>Table S4.</b> Cell type enrichment for differentially expressed genes between FCRx and D |                                           |
|---------------------------------------------------------------------------------------------|-------------------------------------------|
| <b>Cell type</b>                                                                            | <b>Enrichment adjusted-<i>P</i> value</b> |
| CD56+ NK Cells                                                                              | 0.001628                                  |
| CD14+ Monocytes                                                                             | 0.006796                                  |
| CD19+ B cells                                                                               | 0.008276                                  |
| CD105+ Endothelial                                                                          | 0.010358                                  |
| CD33+ Myeloid                                                                               | 0.018414                                  |
| CD34+                                                                                       | 0.024458                                  |

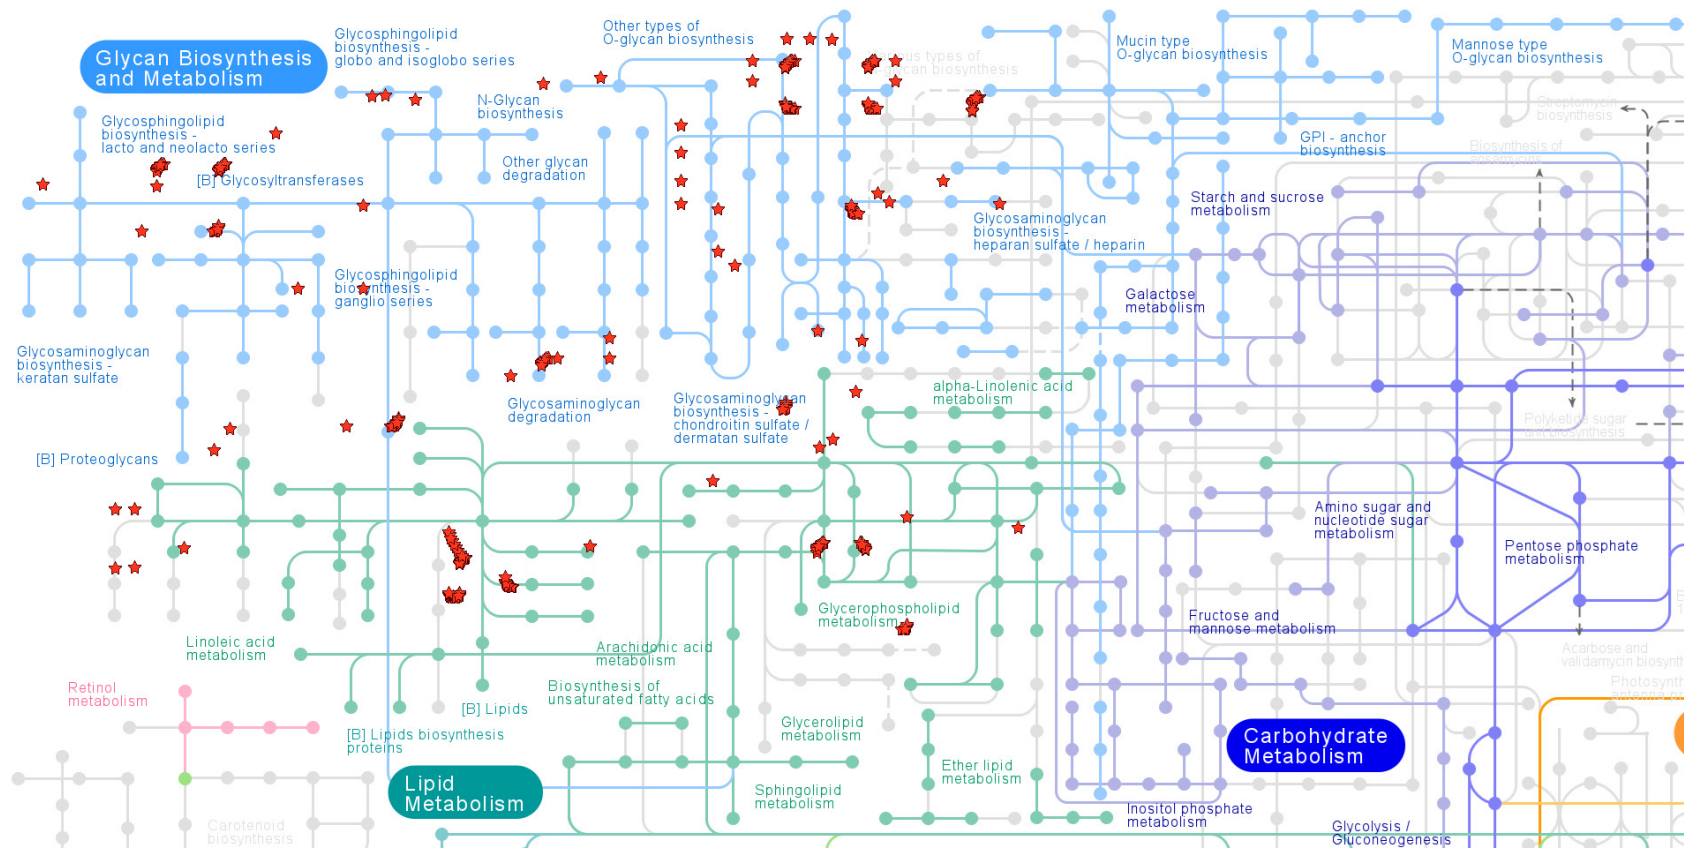

**Fig. S5. KEGG pathway for metabolism showing involvement of listed genes in Glycan biosynthesis and metabolism** The differentially expressed genes between FCRx and D were plotted on KEGG pathway (using DAVID )for metabolism and the genes (red stars) were found to be involved in glycan biosynthesis.

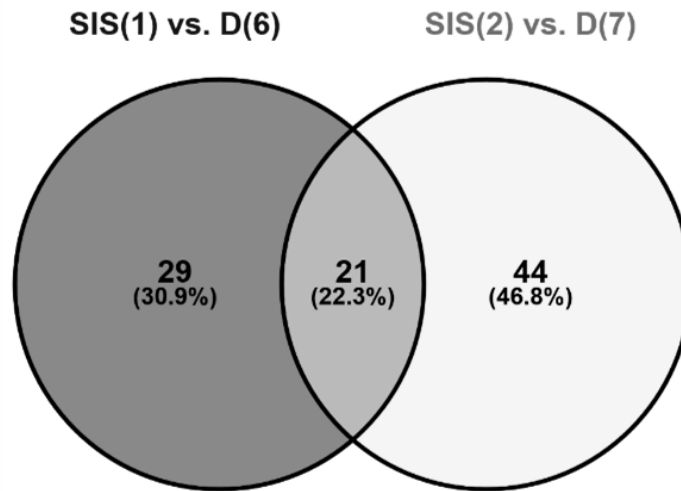

**Fig. S6. Venn diagrams from FCRX vs. D and SIS vs. D pairwise comparisons.** The numbers of unique and common differentially expressed genes between single SIS vs. D comparisons are shown.



**Table S5.** Genes differentially expressed in common between SIS vs. D

| <b>Symbol</b> | <b>Gene Name</b>                                                               | <b>Fold-change<br/>(SIS vs. D)</b> |
|---------------|--------------------------------------------------------------------------------|------------------------------------|
| PDK4          | pyruvate dehydrogenase kinase, isozyme 4                                       | -14.1                              |
| EGR1          | early growth response 1                                                        | -13.9                              |
| DUSP1         | dual specificity phosphatase 1                                                 | -9.0                               |
| FOSB          | FBJ murine osteosarcoma viral oncogene homolog B                               | -7.0                               |
| CYR61         | cysteine-rich, angiogenic inducer, 61                                          | -6.5                               |
| FOS           | FBJ murine osteosarcoma viral oncogene homolog                                 | -5.7                               |
| ZFP36         | ZFP36 ring finger protein                                                      | -5.0                               |
| GADD45B       | growth arrest and DNA-damage-inducible, beta                                   | -4.3                               |
| JUN           | jun proto-oncogene                                                             | -4.1                               |
| IER2          | immediate early response 2                                                     | -3.9                               |
| KLF6          | Kruppel-like factor 6                                                          | -3.2                               |
| RHOB          | ras homolog family member B                                                    | -2.7                               |
| FOSL2         | FOS-like antigen 2                                                             | -2.2                               |
| CEBPD         | CCAAT/enhancer binding protein (C/EBP), delta                                  | -2.1                               |
| KLF9          | Kruppel-like factor 9                                                          | -1.8                               |
| JUND          | jun D proto-oncogene                                                           | -1.4                               |
| HLA-B         | major histocompatibility complex, class I, B                                   | 2.1                                |
| CYCS          | cytochrome c, somatic                                                          | 3.8                                |
| CD24          | CD24 molecule                                                                  | 5.2                                |
| IGF2          | insulin-like growth factor 2 (somatomedin A)                                   | 6.5                                |
| SLC12A1       | solute carrier family 12 (sodium/potassium/chloride transporters),<br>member 1 | 10.3                               |

### **Confirmation of DEGs identified by SensationPlus with RT-qPCR assays.**

To further validate the global gene expression profile comparisons described above using SensationPlus assays, the relative levels of the top 3 DEGs were quantified using Taqman RT-qPCR assays. As shown in **Fig. S7**, there was concordance between the two assays with the selected genes demonstrating comparable expression trends albeit with different levels of statistical significance and dynamic ranges. Moreover, the two differentially expressed genes tested between SIS and FCRx (referred as a T in the Fig. 7), were validated for same RNA samples used for arrays (Fig. 7A) and evaluating same FCRx RNA samples with an independent set of SIS samples (Fig. 7B) [SIS samples used for second validation are described in Table-1 as labeled with (\*)].

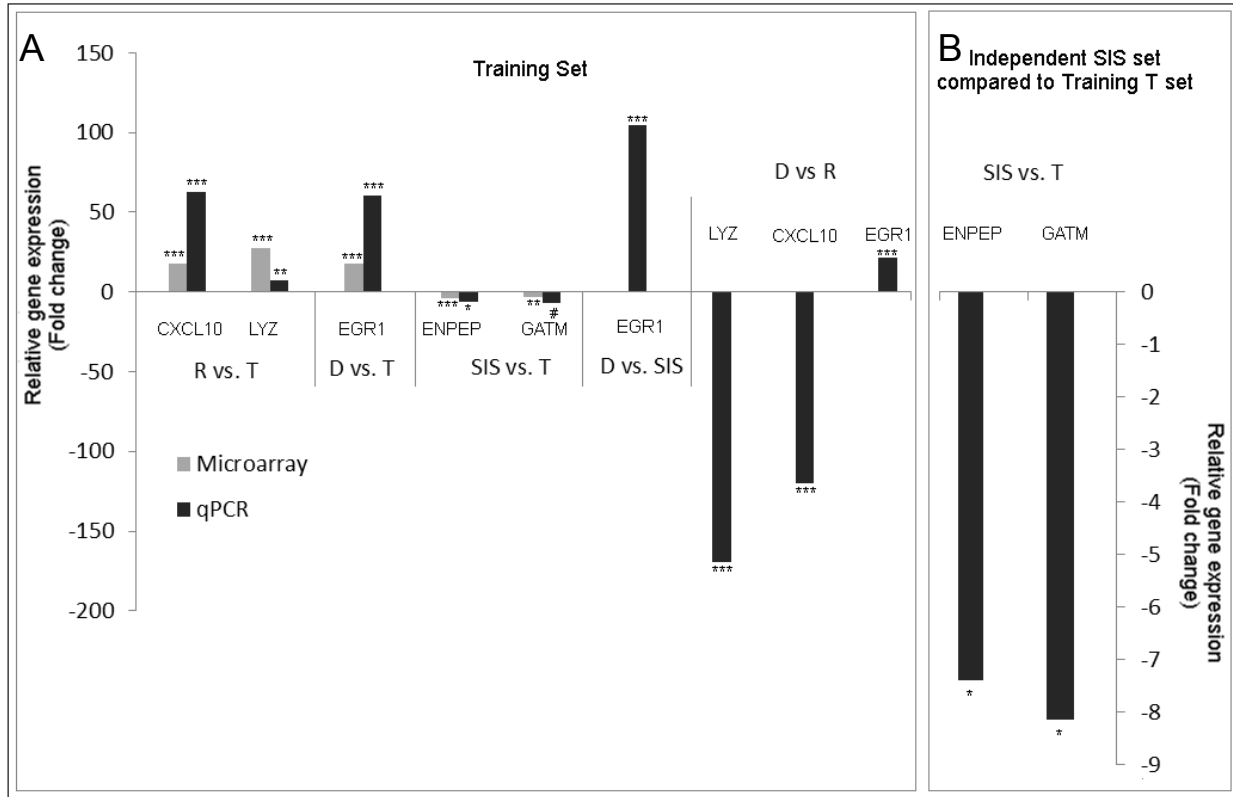

**Fig. S7. Comparison and validation of selected genes.** Taqman RT-qPCR assays were performed to validate the differential expression of CXCL10, LYZ, and EGR1. Expression trends observed by RT-qPCR (black bars) were compared to those obtained by microarrays (gray bars) in the comparisons mentioned in the graphic. (#) trend of significance; (\*)  $p < 0.05$ ; (\*\*)  $p < 0.01$ ; (\*\*\*)  $p < 0.001$ . T refers to FCRx sample group.

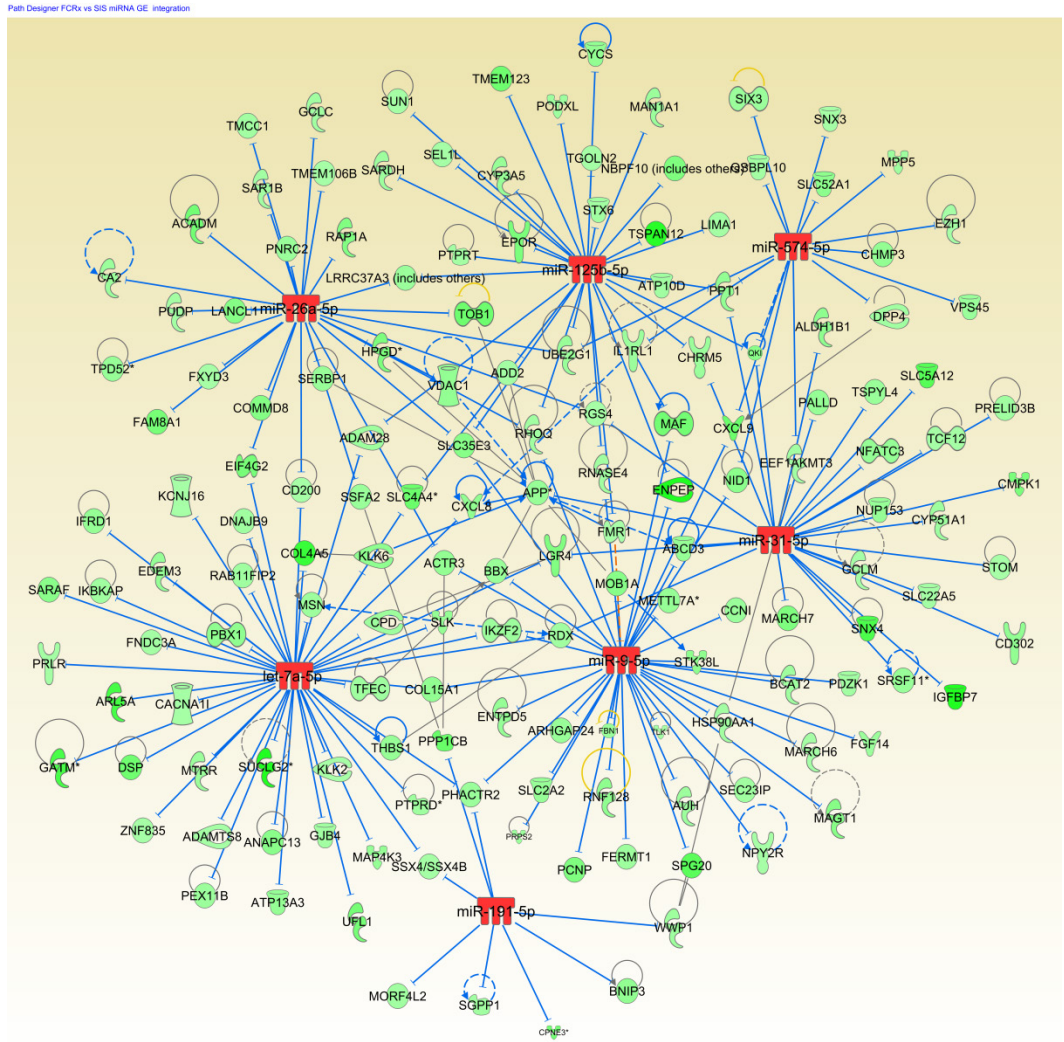

**Fig. S8. Integrative networks showing miRNA differentially expressed from FCRx vs. SIS and their targets.** The 7 significantly upregulated miRNA in FCRx target 198 genes to be differentially down regulated as shown in the network generated by the miRNA target profiler using Ingenuity pathway analysis software. The color codes are represented in the legend present in the figure.

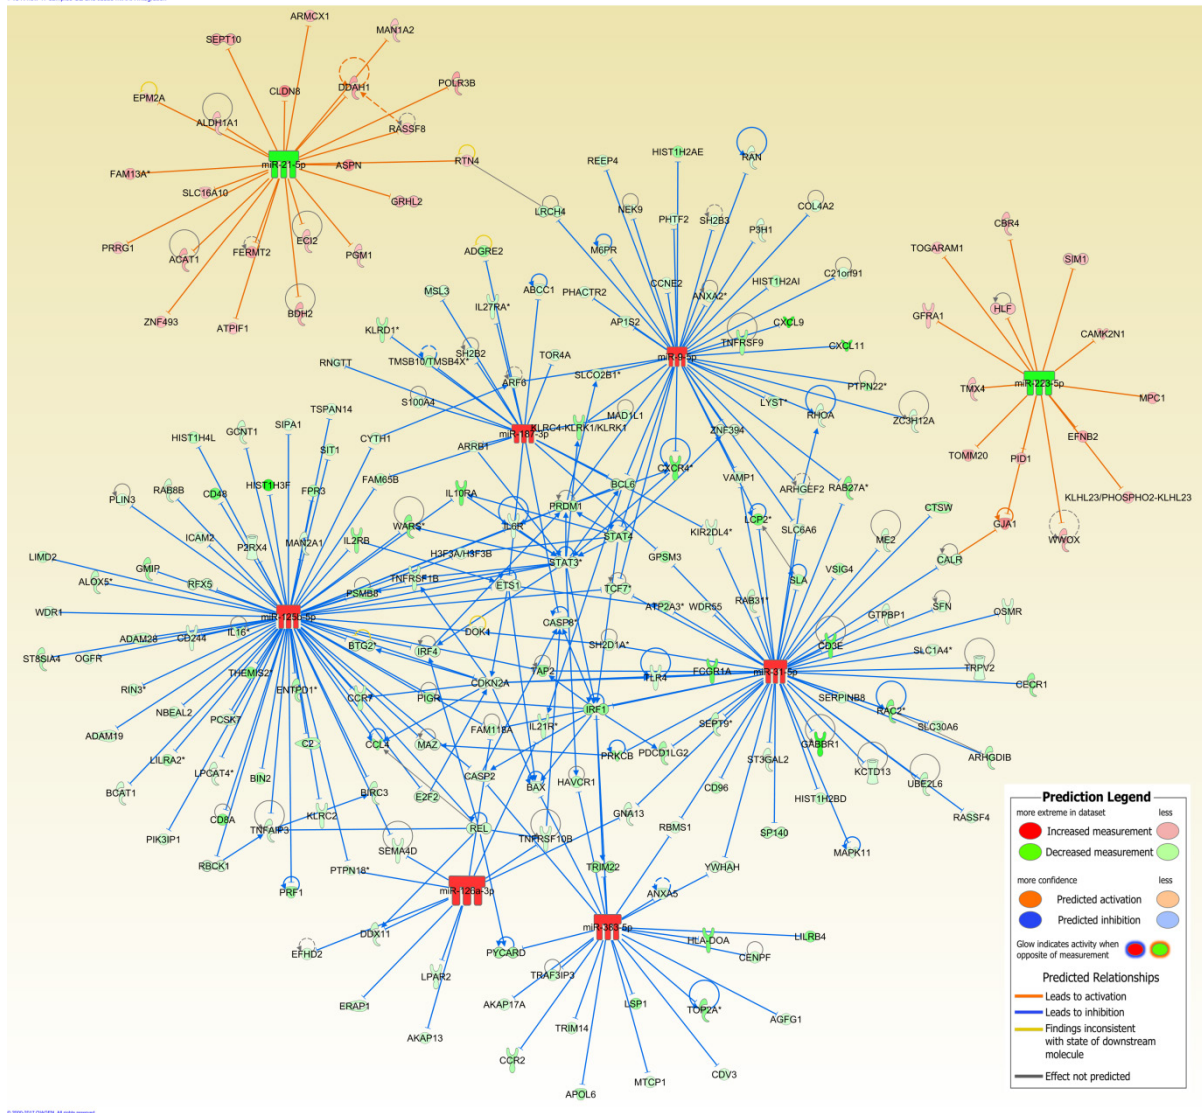

**Fig. S9. Integrative networks showing miRNA differentially expressed from FCRx vs. R and their targets.** Seven of the 10 significantly upregulated miRNA in FCRx target 75 differentially down regulated genes as shown in the network generated by the miRNA target profiler using Ingenuity pathway analysis software. The color codes are represented in the legend present in the figure.
